# Supplementary material for: A species-specific nematocide that results in terminal embryogenesis
Source: Oxford University Press journal article supplement (doi:10.1242/jeb.159665), 2017-01-01
Supplement: jeb159665supp.pdf [file jeb159665supp.pdf]

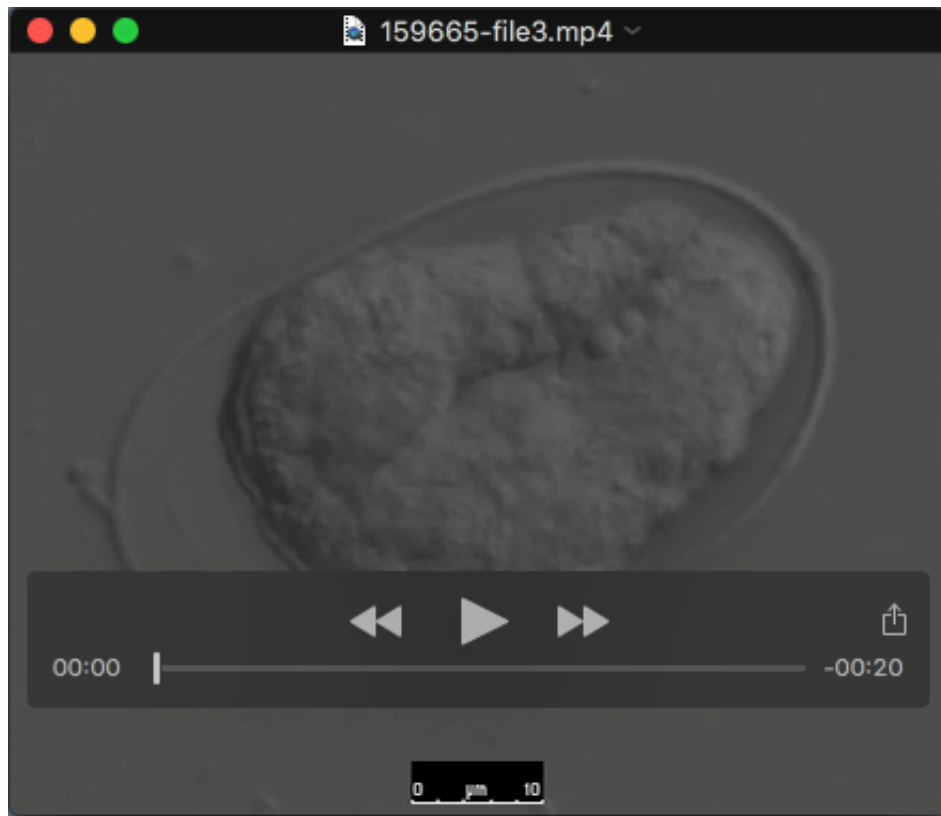

**Movie 1. A two-fold 'zombryo' at 26 hours.** A two-fold 'zombryo' at 26 hours *ex utero* displays sporadic muscle contractions, but has not developed a visible gut or pharyngeal-like structures.

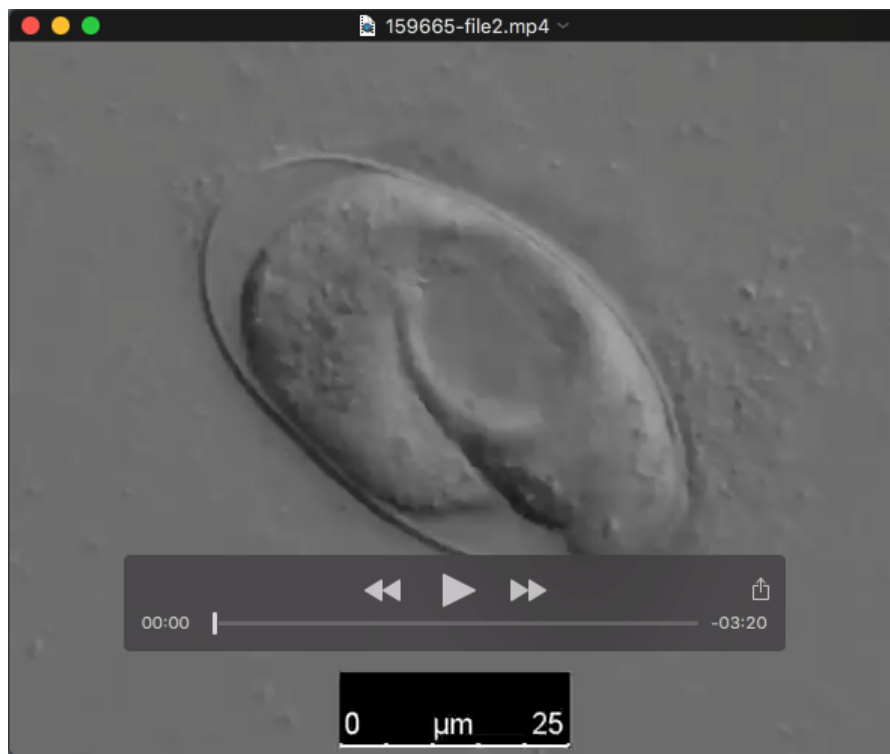

**Movie 2. A two-fold 'zombryo' at 48 hours.** A two-fold 'zombryo' remains active 48 hours *ex utero* but is unable to hatch. The ZTDO-treated embryo has developed a mid-body cavity, in contrast to the two-fold 'zombryo' at 26 hours.

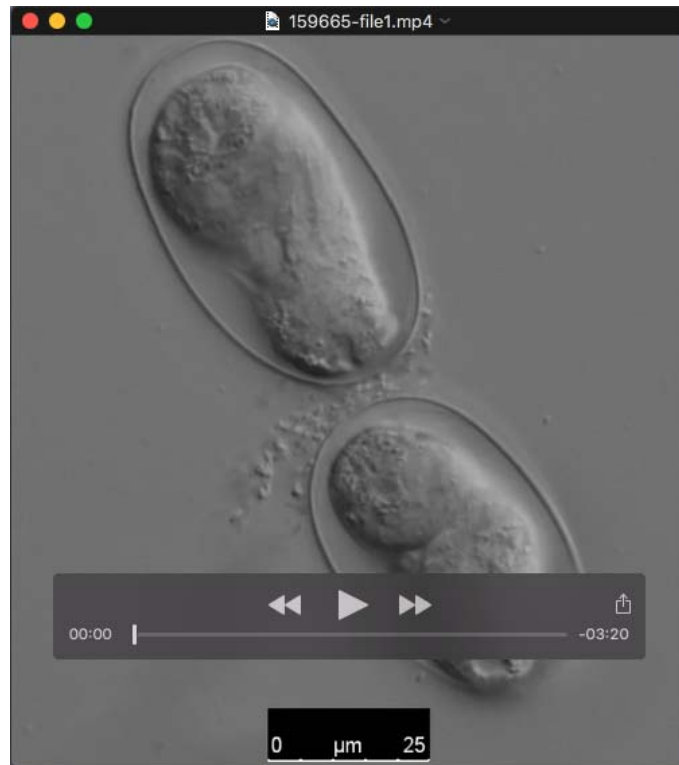

**Movie 3. Two peanut stage 'zombryos' at 48 hours.** Two peanut 'zombryos' have developed gut cavities and muscle tissue by 48 hours *ex utero*. The embryos are unable to hatch but are active 24 hours passed the normal hatching time.
